# Supplementary material for: Two-Component System Genes in Brassica napus: Identification, Analysis, and Expression Patterns in Response to Abiotic and Biotic Stresses
Source: MDPI journal article supplement (doi:10.3390/ijms242417308), 2023-12-09
Supplement: s1 [file s1]

## A

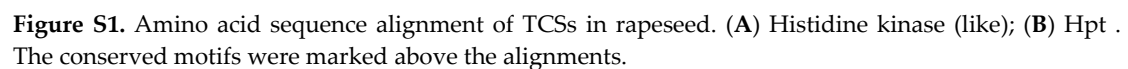

**Figure S1.** Amino acid sequence alignment of TCSs in rapeseed. **(A)** Histidine kinase (like); **(B)** Hpt . The conserved motifs were marked above the alignments.

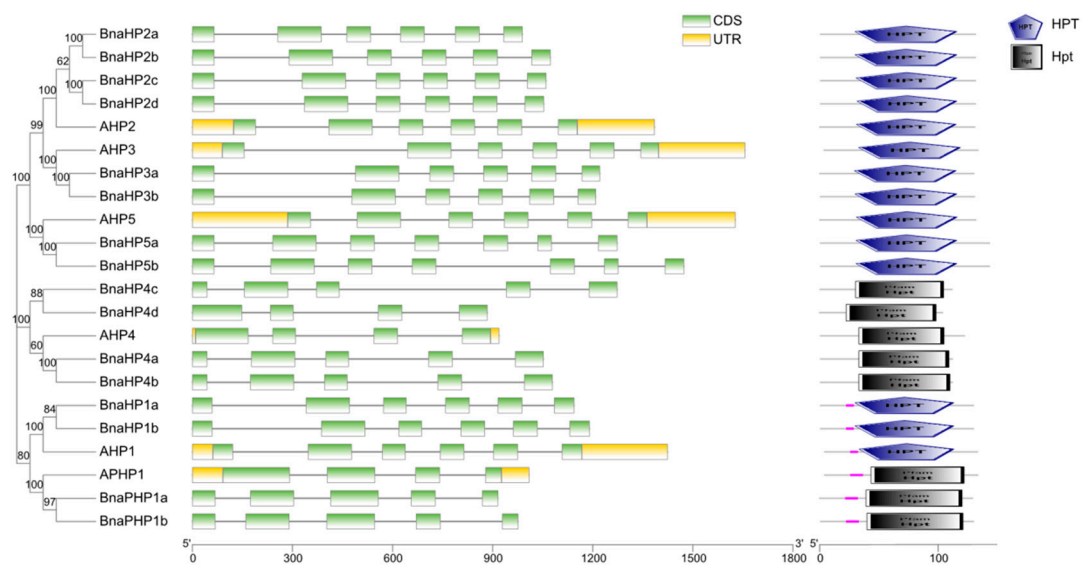

**Figure S2.** Diagram representations of the gene structures and primary domain structures of BnaHPs.

**Figure S3.** Amino acid sequence alignment of RRs in rapeseed. The conserved motifs was also marked above the alignments.



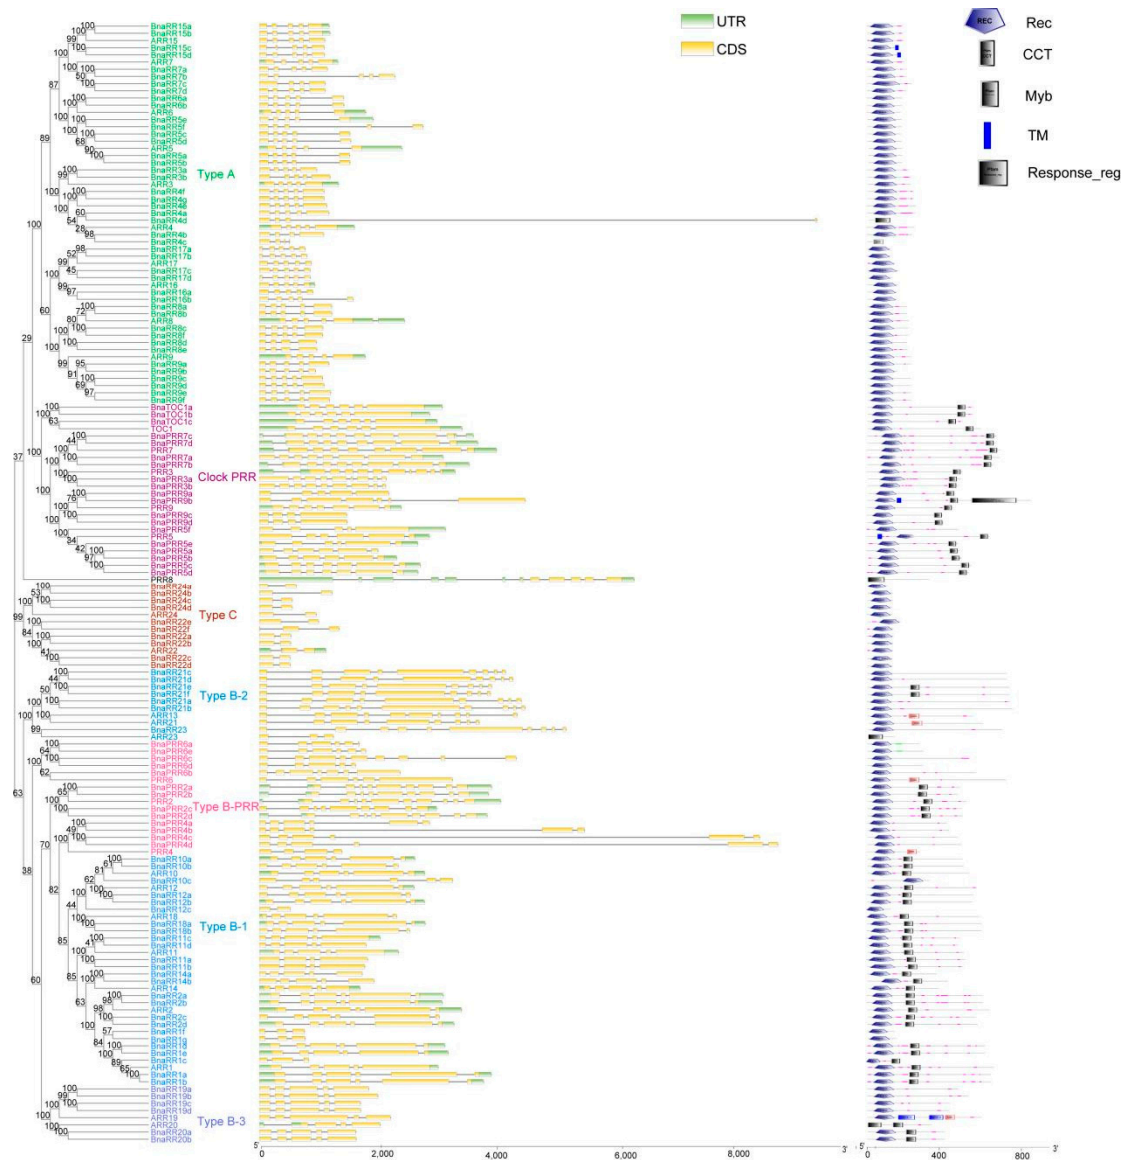

**Figure S4.** Diagram representations of the gene structures and primary domain structures of RR genes in rapeseed.

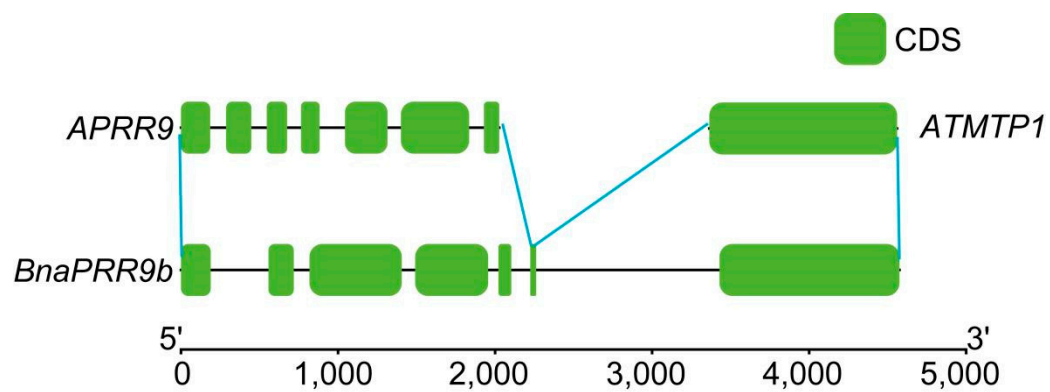

**Figure S5.** Gene structure of *BnaPRR9b*



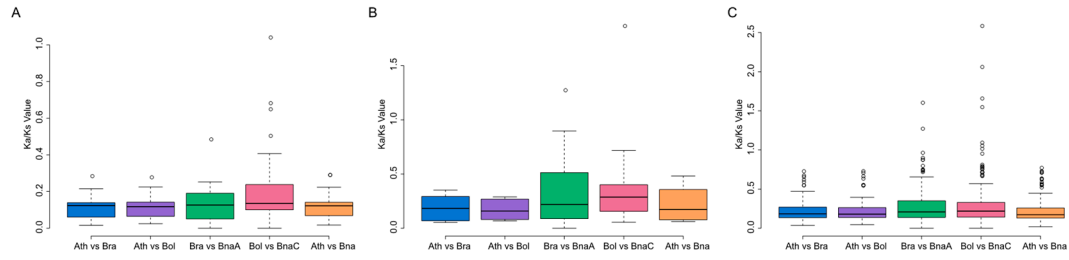

**Figure S6.** Ka/Ks of HKs (A), HPs (B), and RRs (C) orthologous genes between *A. thaliana*, *B. rapa*, *B. oleracea*, and *B. napus*.

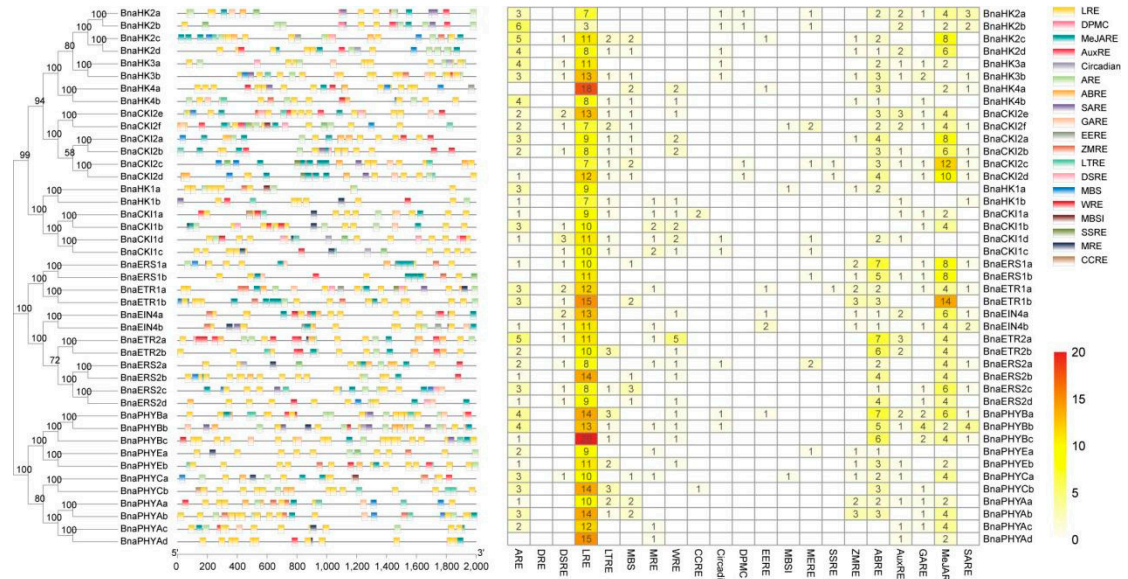

**Figure S7.** Cis-elements in putative promoter regions of HK(L) genes in rapeseed. Heat map on the right representation for numbers of several hormone-related and abiotic stress-related elements.

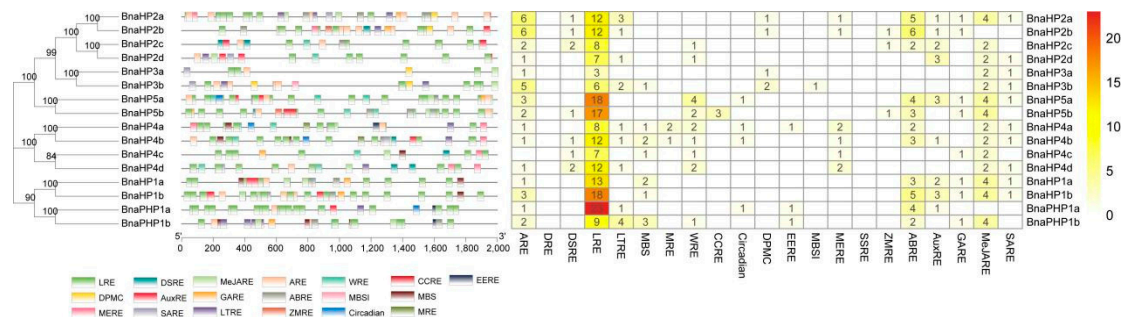

**Figure S8.** Cis-elements in putative promoter regions of HP genes in rapeseed. Heat map on the right representation for numbers of several hormone-related and abiotic stress-related elements.

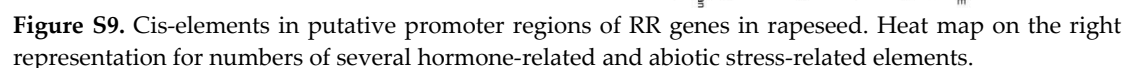

**Figure S9.** Cis-elements in putative promoter regions of RR genes in rapeseed. Heat map on the right representation for numbers of several hormone-related and abiotic stress-related elements.







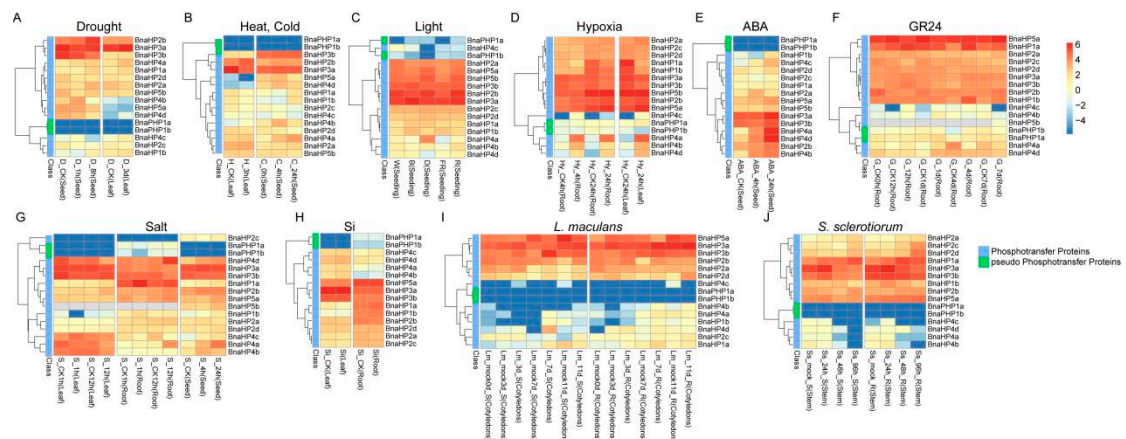

**Figure S11.** Heat map representation for response patterns of BnaHP genes under drought (A), heat and cold (B), light (C), hypoxia (D), ABA (E), GR24 (F), salt (G), si (H), *L. maculans* (I), and *S. sclerotiorum* (J) stress conditions.

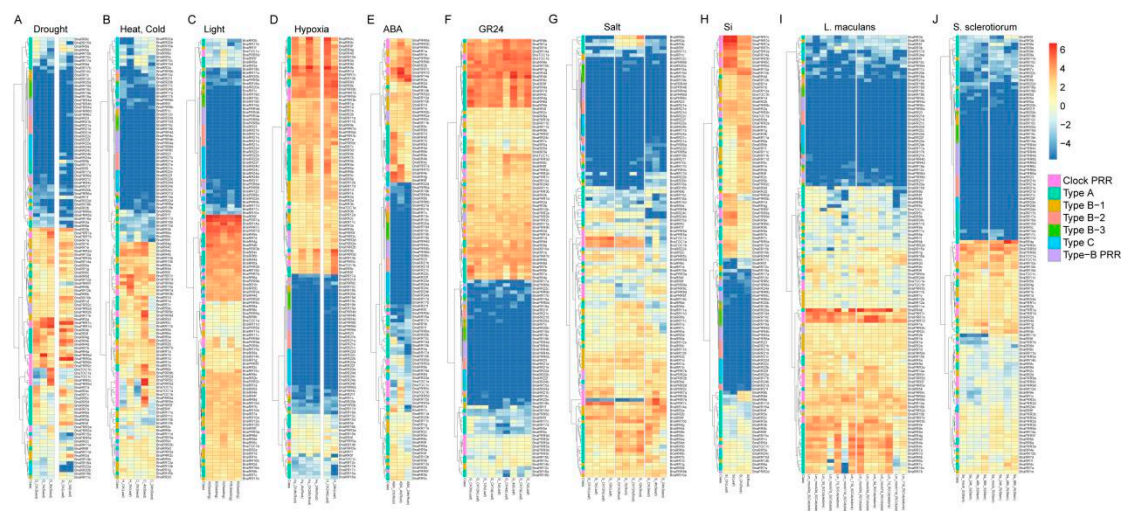

**Figure S12.** Heat map representation for response patterns of BnaRR genes under drought (A), heat and cold (B), light (C), hypoxia (D), ABA (E), GR24 (F), salt (G), si (H), *L. maculans* (I), and *S. sclerotiorum* (J) stress conditions.

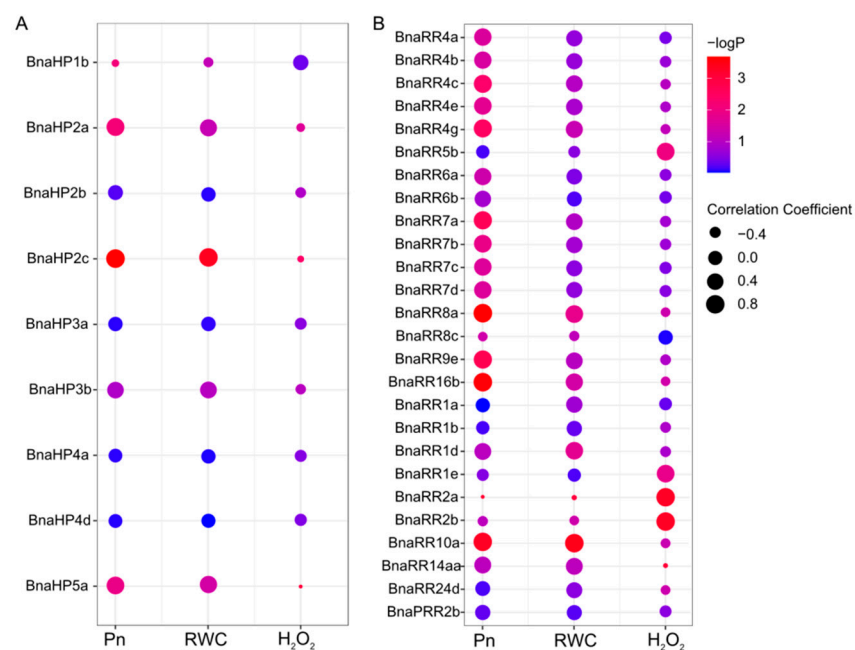

**Figure S13.** The correlation of (A) BnaHPs, and (B) BnaRRs with drought related traits.
